# Supplementary material
Source: HighWire-hosted journal article supplement (http://srh.bmj.com/highwire/filestream/138402/field_highwire_adjunct_files/0/jfprhc-2015-101170supp_figure.pdf)

Supplementary Figure 1. Numbers of women randomised and included in the psychosocial (PS) comparison

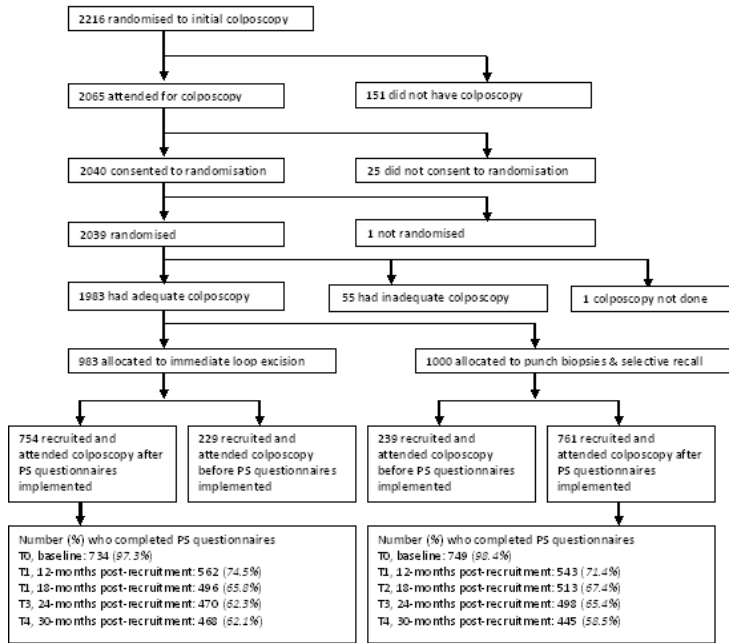

Supplement: jfprhc-2015-101170supp_figure.pdf [file jfprhc-2015-101170supp_figure.pdf]
